# Supplementary material
Source: publisher figshare collection journal article supplement (https://sage.figshare.com/ndownloader/files/15254171)
Supplement: Supplementary file 1 [file 15254171]

**Supplementary Table 3.** Baseline characteristics of patients with ccRCC

| Characteristics          | Patients with ccRCC (N=120) |
|--------------------------|-----------------------------|
| Age (years)              | 58.9±12.1                   |
| Gender (n/%)             |                             |
| Female                   | 50 (41.7)                   |
| Male                     | 70 (58.3)                   |
| Tumor location (n/%)     |                             |
| Right                    | 62 (51.7)                   |
| Left                     | 58 (48.3)                   |
| Pathological grade (n/%) |                             |
| 1                        | 58 (48.3)                   |
| 2                        | 45 (37.5)                   |
| 3                        | 17 (14.2)                   |
| Tumor size (cm)          | 5.5 (3.6-8.0)               |
| T stage (n/%)            |                             |
| T1                       | 84 (70.0)                   |
| T2                       | 28 (23.4)                   |
| T3                       | 8 (6.6)                     |
| N stage (n/%)            |                             |
| N0                       | 111 (92.5)                  |
| N1                       | 9 (7.5)                     |
| M stage (n/%)            |                             |
| M0                       | 120 (100.0)                 |
| TNM stage (n/%)          |                             |
| I                        | 78 (65.0)                   |
| II                       | 28 (23.3)                   |
| III                      | 14 (11.7)                   |

Data were presented as mean ± standard deviation, count (percentage) or median (25<sup>th</sup>-75<sup>th</sup> quantiles). ccRCC: clear cell renal cell carcinoma.
